# Supplementary material for: Multi-trait association studies discover pleiotropic loci between Alzheimer’s disease and cardiometabolic traits
Source: PubMed Central journal article supplement (PMC7860582; doi:10.1186/s13195-021-00773-z), 2021-02-04
Supplement: 13195_2021_773_MOESM1_ESM.pdf [file 13195_2021_773_MOESM1_ESM.pdf]

1 **Supplemental Methods:**

2 **Web resources:**

3 GWAS Catalog, <https://www.ebi.ac.uk/gwas/docs/file-downloads>

4 LocusZoom, <http://locuszoom.org/genform.php>

5 LDlink, <https://ldlink.nci.nih.gov/?tab=ldassoc>

6 MyVariant.info, <https://myvariant.info/>

7 Combined Annotation Dependent Depletion (CADD), <https://cadd.gs.washington.edu/score>

8 Human Splice Finder 3, <http://www.umd.be/HSF3>

9

10 **GWAS data collection:**

11 **AD:**

12 We downloaded the summary statistics from [https://ctg.cncr.nl/software/summary\\_statistics](https://ctg.cncr.nl/software/summary_statistics)

13 (01/22/2019).

14

15 **BFP:**

16 We downloaded the summary statistics from <https://walker05.u.hpc.mssm.edu/> (03/30/2018).

17 GRCh37 positions were added by merging these data on rsIDs with the van der Harst et al.

18 2018 data.

19

20 **BMI:**

21 We downloaded the summary statistics from

22 [https://portals.broadinstitute.org/collaboration/giant/index.php/GIANT\\_consortium\\_data\\_files#20](https://portals.broadinstitute.org/collaboration/giant/index.php/GIANT_consortium_data_files#20)

23 [18 GIANT and UK BioBank Meta Analysis for Public Release](https://portals.broadinstitute.org/collaboration/giant/index.php/GIANT_consortium_data_files#20) (10/29/2018).

24

25 **CHD:**

26 We downloaded the van der Harst et al. 2018 data from [www.cardiomics.net](http://www.cardiomics.net)

1 (02/13/2018).

2

3 **Blood pressure data (DBP and SBP):**

4 We received these data from a corresponding author of Evangelou et al. 2018 (12/07/2018). We  
5 added rsIDs to the file by merging these data on GRCh37 positions based unique IDs with the  
6 full list of SNPs from dbSNP v150 data.

7

8 **Lipids data (HDL, LDL, TC, and TG):**

9 We used the European ancestry data from the Klarin et al. 2018 data. We requested the  
10 European ancestry lipid data from the Million Veterans Program (01/07/2018) and meta-  
11 analyzed these data with the Willer et al. 2013 data using *PLINK*(1). We then removed SNPs  
12 from the meta-analysis file that had an imputation score less than 0.8.

13 Access to the MVP lipids data can be obtained from dbGAP (phs001672.v4.p1, pha004828.1,  
14 pha004831.1, pha004837.1, pha004834.1) and GLGC European ancestry only data can be  
15 obtained at: <http://csg.sph.umich.edu/willer/public/lipids/> or <http://lipidgenetics.org/>.

16

17 **T2D:**

18 We downloaded these data from <http://diagram-consortium.org/downloads.html> (01/04/2019).

19 We added rsIDs by merging these data on GRCh37 positions based unique IDs with full list of  
20 SNPs from the Jansen et al. 2019 AD data file.

21

22 **WHRadjBMI:**

23 We downloaded these data from <https://zenodo.org/record/1251813#.XOxslYhKg2w>

24 (5/28/2019).

1  
2  
3  
4  
5  
6  
7  
8  
9  
10  
11  
12  
13  
14  
15  
16  
17  
18  
19  
20  
21  
22  
23  
24  
25  
26

**Bivariate GWAS:**

The bivariate GWAS method uses GWAS summary statistics from two traits to perform a statistical test of whether each SNP is associated with one or both of the traits from the GWAS data. The method does this by converting the P-value, effect estimates, and standard errors from the summary statistics files to Z-scores(2–4). Given that Z-scores should be standard normal distributed, we can estimate the bivariate normal distribution of the SNP Z-scores. We can then perform an association test for each SNP using a chi-squared test with two degrees of freedom to calculate a bivariate P-value(2–4).

The first step to perform a bivariate scan is to harmonize the alleles of the summary statistics data from the two GWAS studies using the `harmonise_data` function in *MRbase*(5). We next use *PLINK* to obtain independent SNPs using the command “`--indep-pairwise 1000 5 0.2`” with the 1000 Genomes phase 3 European ancestry (1kG EUR) as the linkage reference panel(6). We estimate the mean and covariance matrix of the bivariate normal distribution of SNP Z-scores using the independent SNPs. As described above, we then used these parameters to calculate a bivariate P-value for each harmonized SNP(2–4). Independent associated loci were produced using the “`--clump-r2 0.2`” command in *PLINK*(1). We further filtered independent associated loci differently for the “AD-centric” and the “locus discovery” experiment to detect loci of interest (see Materials and Methods: AD-centric Analysis and Locus Discovery Analysis).

**MOLOC for the *SPPL2A* locus:**

To perform a colocalization analysis between the AD, HDL, and DBP association peaks at the *SPPL2A* locus we used the *MOLOC* library in R(7). *MOLOC* is an extension of the *COLOC*

1 software that calculates the posterior probability of colocalization between 2 or more traits. We  
2 ran *MOLOC* on the same input data that we used to run *COLOC* between the AD and HDL  
3 association peaks and the AD and DBP association peaks. We then calculated the conditional  
4 probability of colocalization as the posterior probability of colocalization conditioned on the  
5 presence of a signal for each trait.

6

#### 7 ***In silico* variant assessment of rs144867634:**

8

9 We searched the MyVariant database and the Combined Annotation Dependent Depletion  
10 (CADD) data base to review the functional annotation of rs144867634  
11 (<http://myvariant.info/v1/variant/chr7:g.111580166T%3EC> and  
12 [https://cadd.gs.washington.edu/snv/GRCh37-v1.4/7:111580166\\_T\\_C](https://cadd.gs.washington.edu/snv/GRCh37-v1.4/7:111580166_T_C))(8,9). The collection of  
13 these annotations agreed that this variant was a missense variant in *DOCK4*. However, the  
14 predicted change in amino acid from methionine to valine was not likely to be deleterious to the  
15 *Dock4* protein function. Thus, we wanted to determine what the predicted effect of rs144867634  
16 would be on the splicing of *DOCK4* via Human Splice Finder 3 (HSF3) and AVISPA(10,11).

17

#### 18 **Human Splice Finder analysis:**

19

20 Human Splice Finder 3 (HSF3) is an ensemble method intended to predict the effect of  
21 exonic and intronic variants on the splicing of a gene(10). We used the analyze mutations  
22 function of HSF3, and provided the cDNA position of rs144867634 (c.976A>G) in the *DOCK4*  
23 transcript ENST00000428084 on February 28, 2019. Results can be seen in Supplemental  
24 Table 12. The results suggest that the C allele of rs144867634 will lead to a new exonic splice  
25 silencer (ESS) and will alter an exonic splice enhancer (ESE).

26

1 **AVISPA**

2

3 AVISPA is a web-tool for splicing prediction and analysis of cassette splicing events. Using  
4 splicing features derived from exonic and intronic regions of the exon triplet, AVISPA predicts if  
5 the central exon is alternatively or constitutively spliced and displays tissue-specific splicing  
6 variations in inclusion levels of the central exon in 4 tissue groups: central nervous system,  
7 muscle, digestive and embryonic tissue group. We ran AVISPA on the target exon (GRCh37  
8 chr7:111580165-111580297) containing rs144867634, along with two flanking exons (GRCh37  
9 chr7:111584866-111584926, chr7:111575595-111575683) (Supplemental Table 15 and  
10 Supplemental Table 16). Two configurations of input genomic sequences were provided to  
11 AVISPA, one for each allele of rs144867634. For both of these configurations, AVISPA  
12 predicted if the exon is alternative or constitutive and tissue-specific splicing variations  
13 (differential inclusion or exclusion of the central exon) in each of the 4 tissues groups. For each  
14 of these predictions, we report false positive rate, rank and sensitivity of the prediction. The  
15 results suggest that exon 11 is not a constitutively included exon and that the low frequency G  
16 allele alters splicing of exon 11 of *DOCK4* in digestive and central nervous system tissues.  
17  
18

1 **Figure S1. ADAM10 locus**

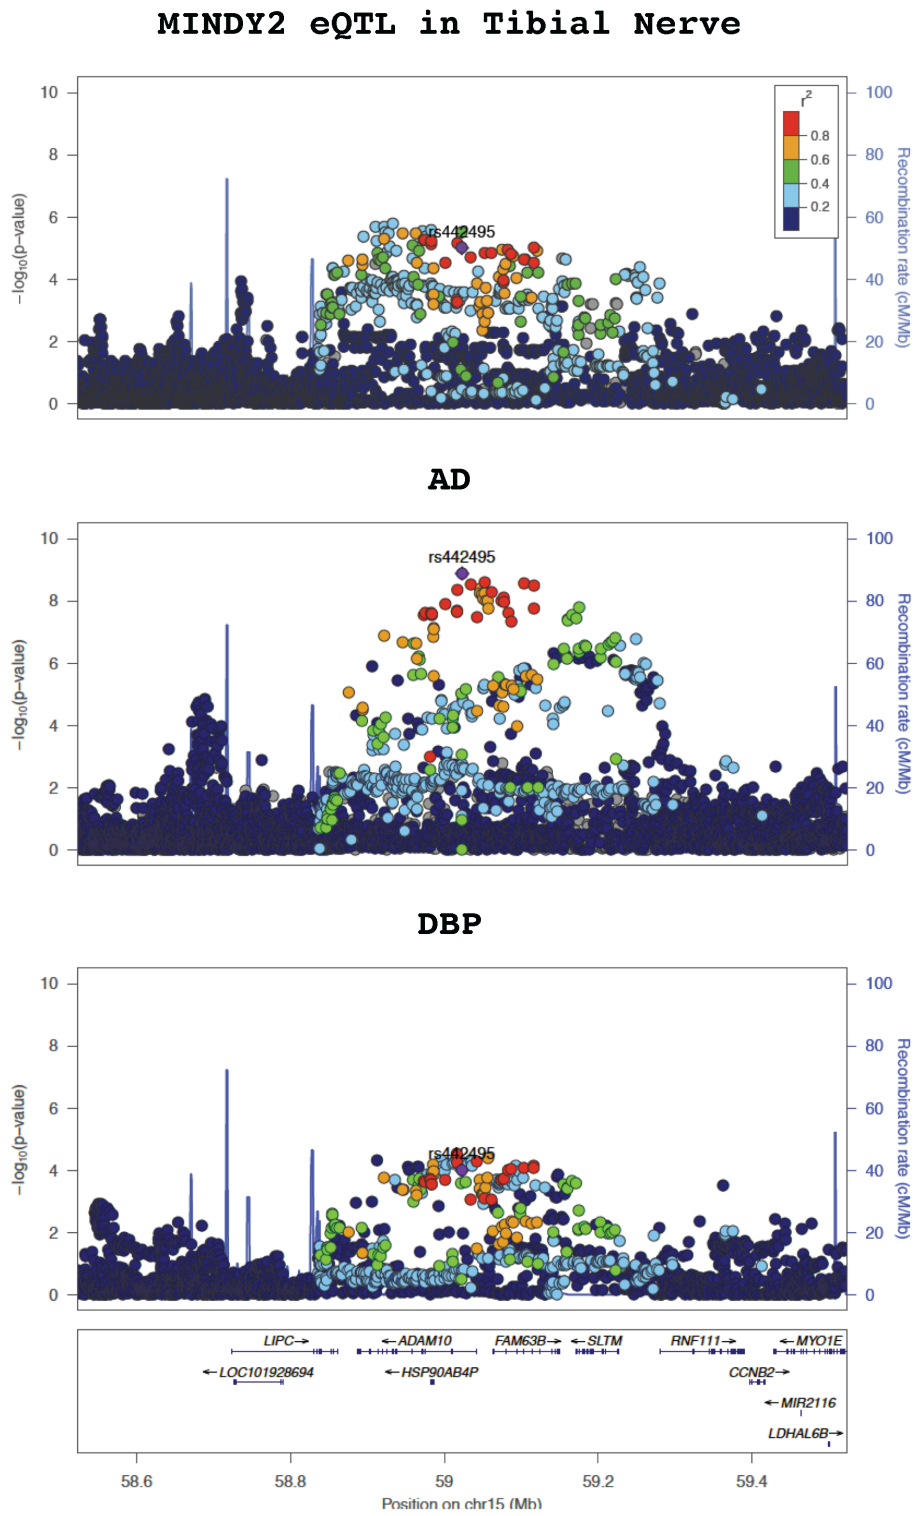

2

- 1 Pleiotropic signal between DBP and AD and the *MINDY2* eQTL signal at the *ADAM10* locus.
- 2 The top panel is the eQTL signal for the gene *MINDY2* in tibial nerve from GTEx v7. The middle
- 3 panel show the AD association peak at this locus. The bottom panel shows the association peak
- 4 for BFP at this locus.
- 5

1 **Figure S2. *ADAMTS4* locus**

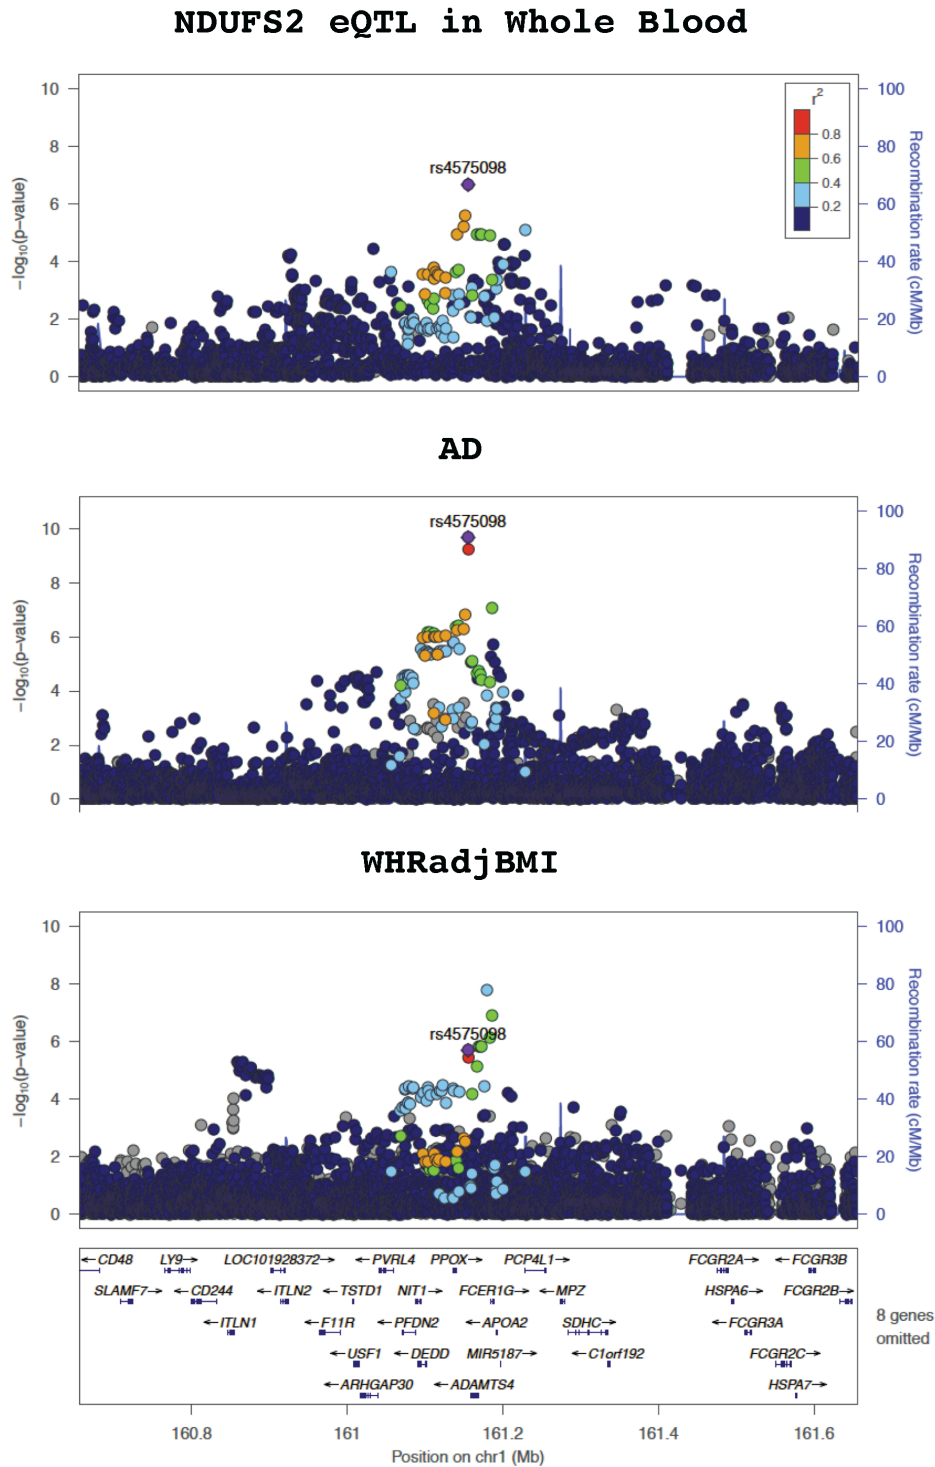

2

3 Pleiotropic signal between WHRadjBMI and AD and the *NDUFS2* eQTL signal at the *ADAMTS4*

4 locus. The top panel is the eQTL data for the gene *NDUFS2* in whole blood from GTEx v7. The



- 1 middle panel show the AD association peak at this locus. The bottom panel shows the
- 2 association peak for BFP at this locus.
- 3

1 **Figure S3. T2D at ACE locus**

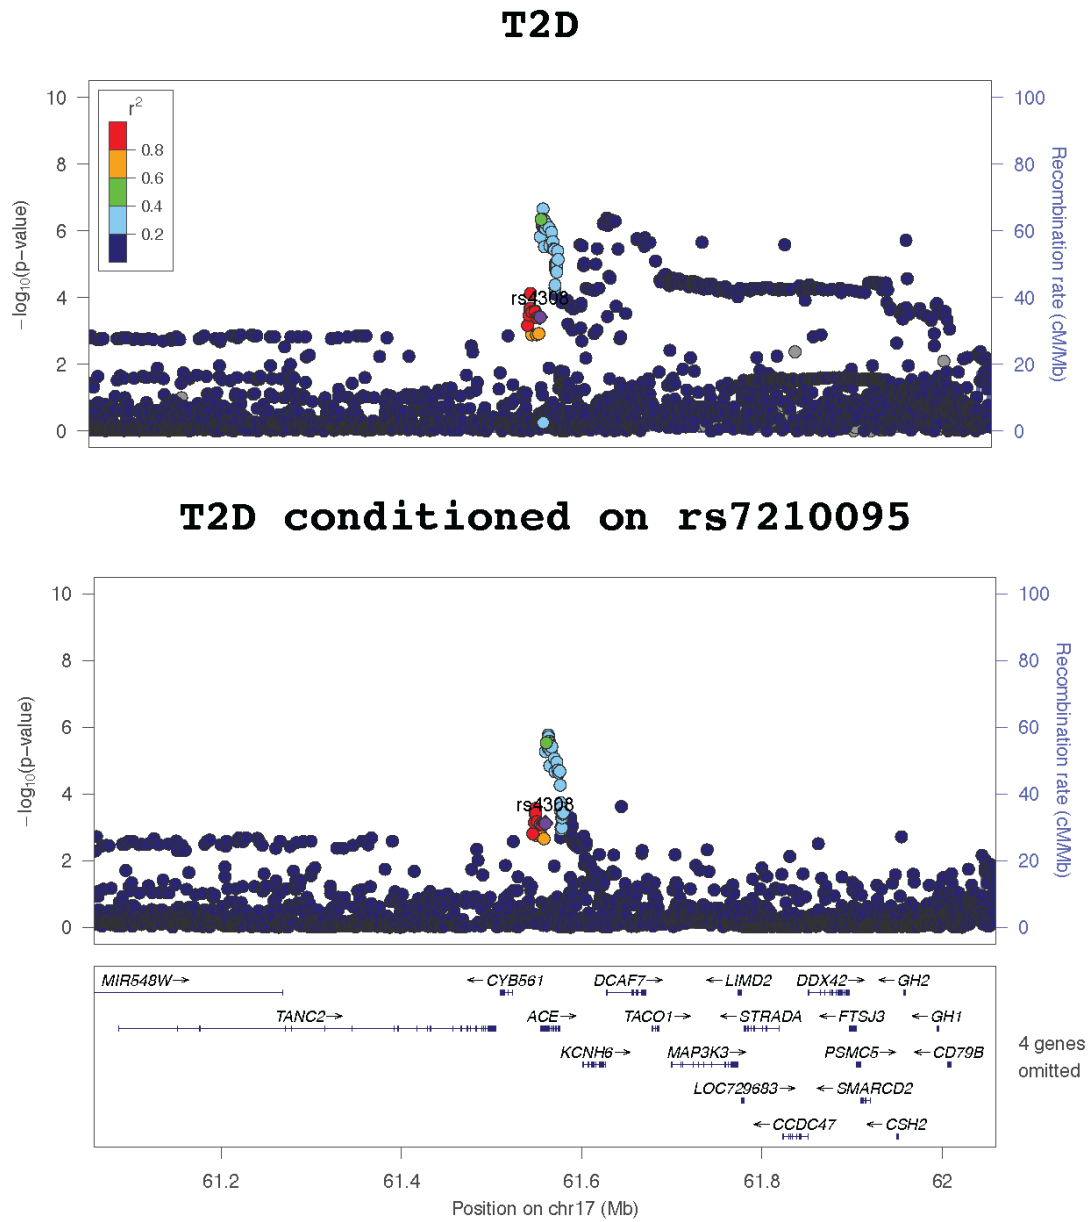

2  
 3 T2D signal at the *ACE* locus. The top panel is the T2D association peak at this locus. The  
 4 bottom panel shows the same association peak after conditioning on rs7210095.

5  
 6

1 **Figure S4. DOC2A Locus**

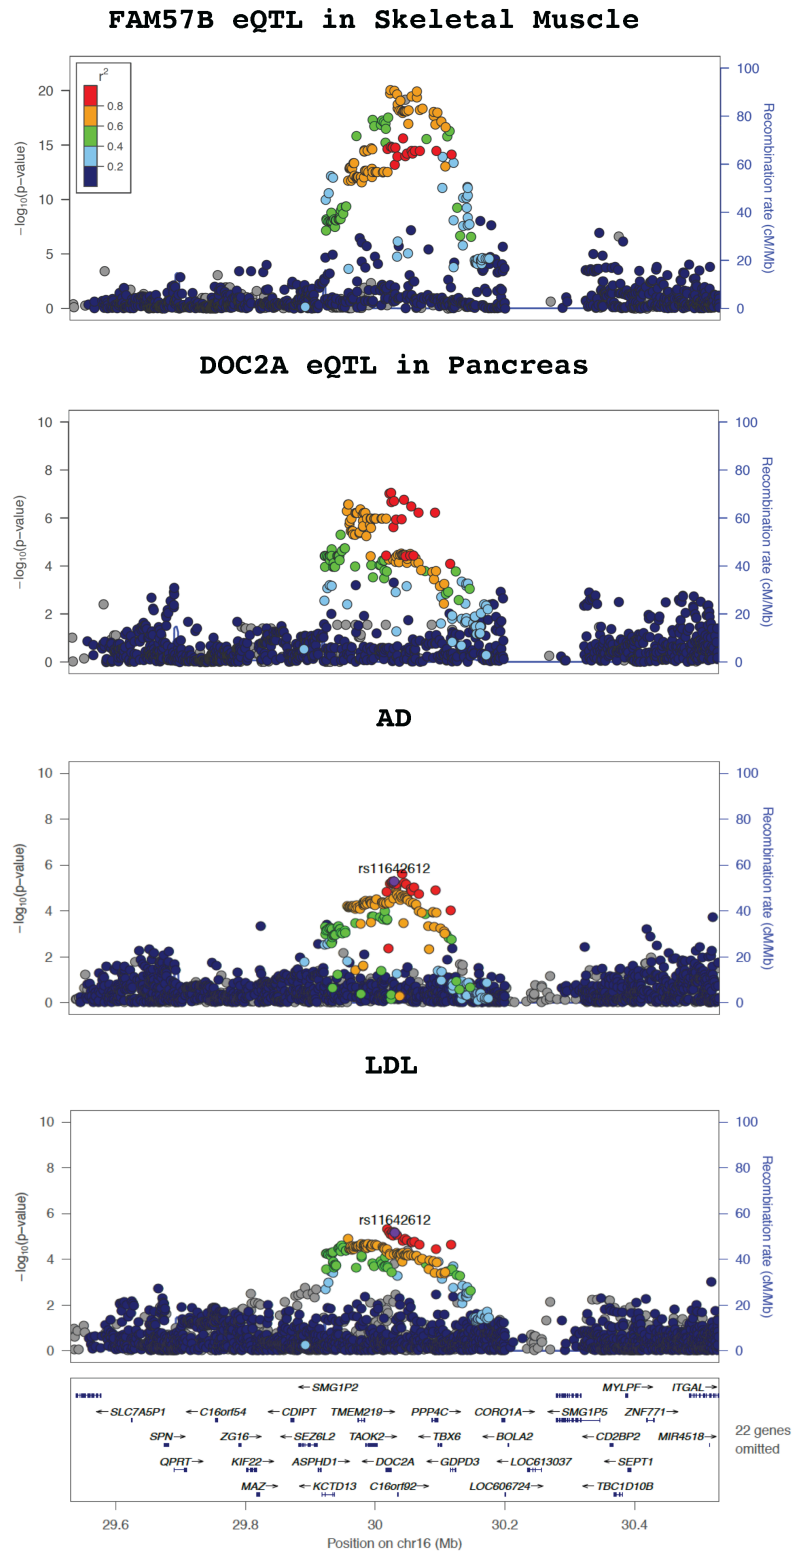

2

1 Pleiotropic signal between LDL and AD and the *FAM57B* and *DOC2A* eQTL signals at the  
2 *DOC2A* locus. The top two panels are the eQTL data for the gene *FAM57B* in skeletal muscle  
3 and *DOC2A* in pancreas from GTEx v7. The second from bottom panel show the AD  
4 association peak at this locus. The bottom panel shows the association peak for LDL at this  
5 locus.  
6

1 **Figure S5. SPPL2A Locus**

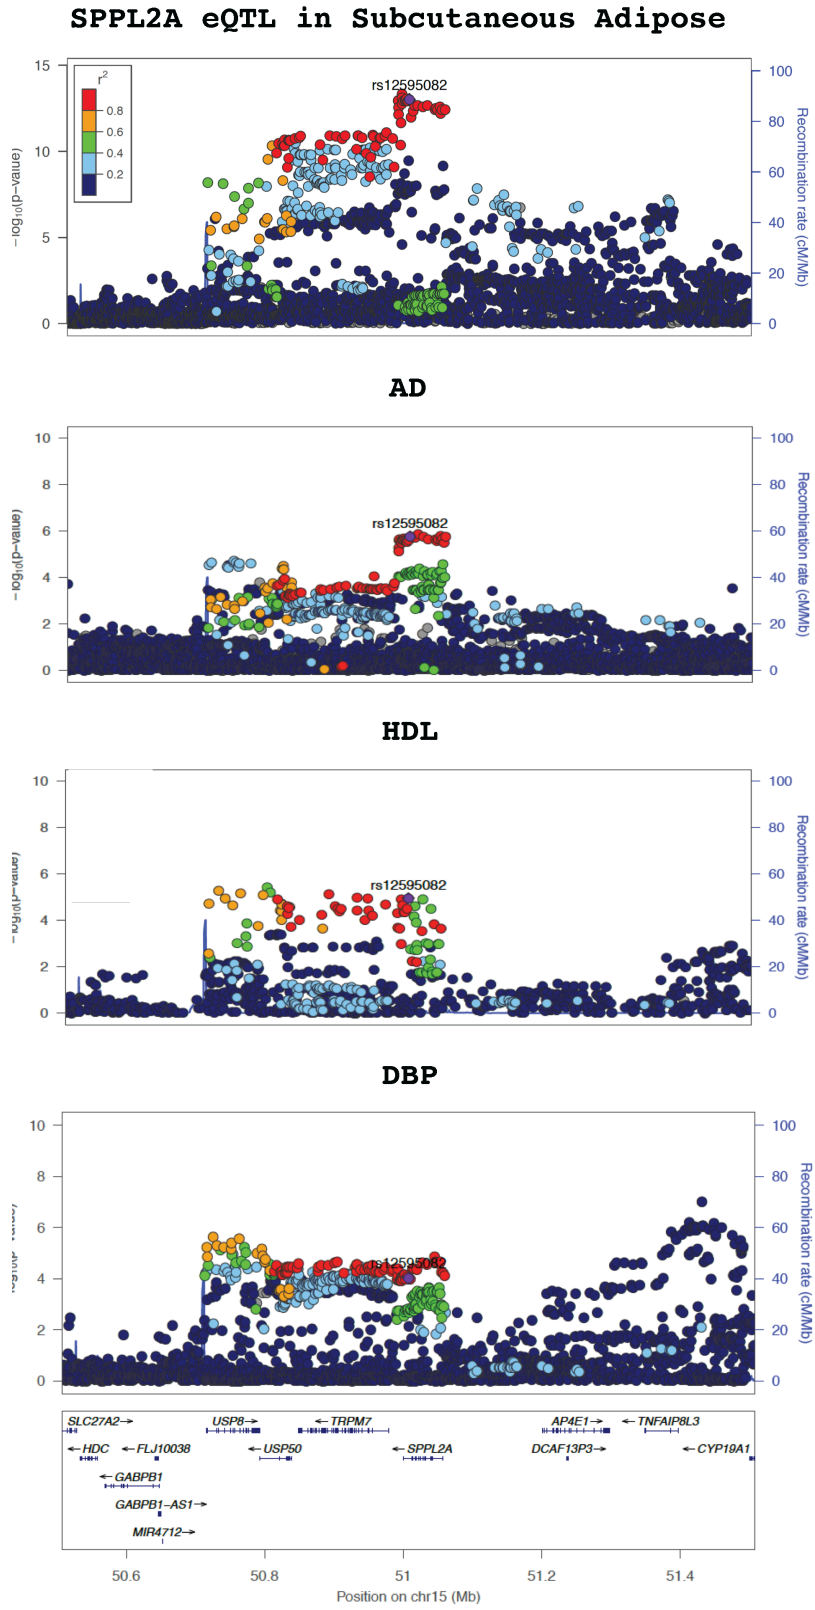

2

- 1 Pleiotropic signal between HDL, DBP, and AD the *SPPL2A* eQTL signal at the *SPPL2A* locus.
- 2 The top panel is the eQTL data for the gene *SPPL2A* in subcutaneous adipose tissue from
- 3 GTEx v7. The second panel shows the AD association peak at this locus. The bottom two
- 4 panels show the association peaks for HDL and DBP at this locus.
- 5
- 6

1 **Figure S6. CCNT2 Locus**

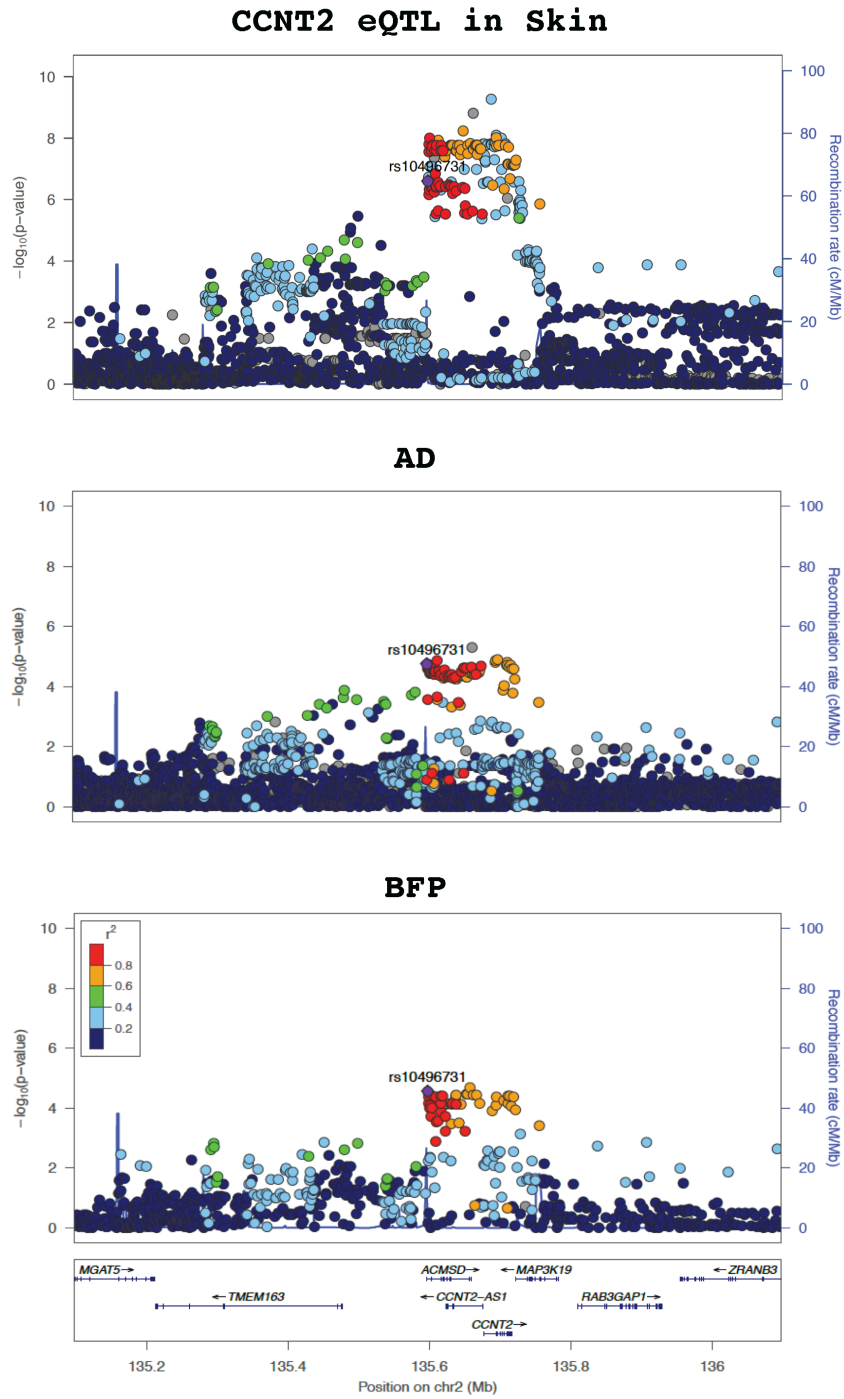

2

3 Pleiotropic signal between BFP and AD and the *CCNT2* eQTL signal at the *CCNT2* locus. The

4 top panel is the eQTL data for the gene *CCNT2* in skin tissue from GTEx v7. The middle panel

- 1 show the AD association peak at this locus. The bottom panel shows the association peak for
- 2 BFP at this locus.
- 3
- 4



1 **Supplementary Table 1. Bivariate normal estimates for the SNP Z-scores of each**  
 2 **bivariate GWAS**

| Trait     | AD estimate of mean of Z scores | CM trait estimate of mean of Z scores | AD variance of Z scores | CM variance of Z scores | Covariance of Z scores |
|-----------|---------------------------------|---------------------------------------|-------------------------|-------------------------|------------------------|
| BFP       | 0.019069449                     | 0.004121425                           | 1.0478863729            | 0.9702646909            | 0.0009233505           |
| BMI       | 0.02074968                      | 0.01606504                            | 1.05495557              | 2.34574289              | 0.02398266             |
| CHD       | 0.01487529                      | 0.01435294                            | 1.03299962              | 1.13093119              | 0.01132046             |
| DBP       | 0.022262691                     | -0.00498686                           | 1.03489018              | 1.67147079              | 0.00735901             |
| HDL       | 0.021838610                     | 0.006383637                           | 1.06941806              | 1.56940615              | -0.01795169            |
| LDL       | 0.021876493                     | -0.001275281                          | 1.06665635              | 1.35407634              | 0.02037287             |
| SBP       | 0.023884462                     | -0.009548027                          | 1.037958337             | 1.685590553             | 0.009512961            |
| TC        | 0.023248753                     | -0.003845626                          | 1.06677737              | 1.42491297              | 0.02135301             |
| TG        | 0.021774919                     | -0.003854562                          | 1.0679191               | 1.5151773               | 0.0241633              |
| T2D       | 0.01014445                      | 0.19602156                            | 1.02348921              | 1.16633941              | 0.01110318             |
| WHRadjBMI | 0.009765370                     | -0.002654256                          | 1.023994769             | 1.268734246             | 0.006502855            |

3

4

1 **Supplementary Table 2. Number of SNPs that passed each filter for the AD-centric**  
 2 **analysis**

3

| Trait     | Total Number of SNPs | Independent bivariate significant SNPs | AD associated SNPs that are possibly pleiotropic | Loci remaining after <i>HLA</i> and <i>APOE</i> loci filter | Colocalizing SNP |
|-----------|----------------------|----------------------------------------|--------------------------------------------------|-------------------------------------------------------------|------------------|
| BFP       | 2,601,279            | 65                                     | 6                                                | 2                                                           | 0                |
| BMI       | 2,324,672            | 145                                    | 16                                               | 6                                                           | 0                |
| CHD       | 7,783,726            | 201                                    | 35                                               | 4                                                           | 0                |
| DBP       | 7,094,064            | 810                                    | 18                                               | 9                                                           | 2                |
| HDL       | 2,1784,81            | 413                                    | 26                                               | 0                                                           | 0                |
| LDL       | 2,174,511            | 380                                    | 35                                               | 0                                                           | 0                |
| SBP       | 7,023,719            | 732                                    | 22                                               | 5                                                           | 1                |
| T2D       | 11,215,941           | 528                                    | 21                                               | 4                                                           | 0                |
| TC        | 2,034,485            | 435                                    | 31                                               | 0                                                           | 0                |
| TG        | 2,174,226            | 401                                    | 24                                               | 3                                                           | 0                |
| WHRadjBMI | 11,075,870           | 1,052                                  | 21                                               | 6                                                           | 1                |
| Total     | 55,502,493           | 5,162                                  | 255                                              | 39                                                          | 4                |

4 Note: One of the novel loci was detected in both the SBP and AD and the DBP and AD-centric  
 5 analyses.

6

7

1 **Supplementary Table 3. Number of SNPs that passed each filter for the locus discovery**  
 2 **analysis**

| Trait     | Total Number of SNPs | Independent bivariate significant SNPs | Novel SNPs that are possibly pleiotropic | Colocalizing SNP |
|-----------|----------------------|----------------------------------------|------------------------------------------|------------------|
| BFP       | 2,601,279            | 73                                     | 1                                        | 1                |
| BMI       | 2,324,672            | 145                                    | 1                                        | 0                |
| CHD       | 7,783,726            | 381                                    | 2                                        | 0                |
| DBP       | 7,094,064            | 810                                    | 2                                        | 1                |
| HDL       | 2,1784,81            | 413                                    | 2                                        | 1                |
| LDL       | 2,174,511            | 380                                    | 1                                        | 0                |
| SBP       | 7,023,719            | 732                                    | 0                                        | 1                |
| T2D       | 11,215,941           | 528                                    | 2                                        | 0                |
| TC        | 2,034,485            | 435                                    | 0                                        | 0                |
| TG        | 2,174,226            | 401                                    | 0                                        | 0                |
| WHRadjBMI | 11,075,870           | 1,052                                  | 3                                        | 0                |
| Total     | 55,502,493           | 5,350                                  | 14                                       | 4                |

3 Note: One of the novel loci was detected in both the HDL and AD and the DBP and AD bivariate  
 4 GWAS.

5

6

1 **Supplementary Table 4. Single-tissue eQTLs for rs4308 downloaded from GTExPortal**  
 2 **Jan. 7<sup>th</sup> 2020**

| Gencode ID         | Gene Symbol | P-Value   | Normalized Effect Size | Tissue                                   |
|--------------------|-------------|-----------|------------------------|------------------------------------------|
| ENSG00000159640.15 | ACE         | 1.20E-27  | -0.29                  | Cells - Cultured fibroblasts             |
| ENSG00000159640.15 | ACE         | 1.50E-22  | 0.46                   | Colon - Transverse                       |
| ENSG00000159640.15 | ACE         | 4.20E-16  | 0.26                   | Lung                                     |
| ENSG00000159640.15 | ACE         | 2.90E-15  | -0.18                  | Skin - Sun Exposed (Lower leg)           |
| ENSG00000159640.15 | ACE         | 2.70E-11  | -0.15                  | Adipose - Subcutaneous                   |
| ENSG00000159640.15 | ACE         | 1.80E-09  | -0.41                  | Brain - Cerebellum                       |
| ENSG00000159640.15 | ACE         | 2.20E-08  | -0.18                  | Nerve - Tibial                           |
| ENSG00000159640.15 | ACE         | 4.20E-08  | 0.56                   | Kidney - Cortex                          |
| ENSG00000159640.15 | ACE         | 1.10E-07  | -0.28                  | Adrenal Gland                            |
| ENSG00000159640.15 | ACE         | 2.90E-07  | -0.14                  | Skin - Not Sun Exposed (Suprapubic)      |
| ENSG00000159640.15 | ACE         | 3.30E-07  | -0.38                  | Brain - Frontal Cortex (BA9)             |
| ENSG00000159640.15 | ACE         | 6.70E-07  | -0.31                  | Brain - Cortex                           |
| ENSG00000159640.15 | ACE         | 7.30E-07  | -0.16                  | Adipose - Visceral (Omentum)             |
| ENSG00000159640.15 | ACE         | 9.20E-07  | -0.39                  | Brain - Cerebellar Hemisphere            |
| ENSG00000159640.15 | ACE         | 0.0000019 | -0.17                  | Artery - Aorta                           |
| ENSG00000159640.15 | ACE         | 0.000019  | -0.38                  | Brain - Anterior cingulate cortex (BA24) |
| ENSG00000224353.2  | ACE3P       | 0.000024  | 0.14                   | Testis                                   |
| ENSG00000213218.10 | CSH2        | 0.0000013 | -0.34                  | Testis                                   |
| ENSG00000136485.14 | DCAF7       | 1.90E-11  | 0.17                   | Lung                                     |
| ENSG00000108592.16 | FTSJ3       | 2.00E-09  | 0.18                   | Thyroid                                  |
| ENSG00000108592.16 | FTSJ3       | 3.40E-08  | 0.14                   | Muscle - Skeletal                        |
| ENSG00000108592.16 | FTSJ3       | 5.20E-08  | 0.13                   | Esophagus - Mucosa                       |
| ENSG00000108592.16 | FTSJ3       | 1.70E-07  | 0.14                   | Cells - Cultured fibroblasts             |
| ENSG00000108592.16 | FTSJ3       | 3.00E-07  | 0.2                    | Artery - Tibial                          |
| ENSG00000108592.16 | FTSJ3       | 8.10E-07  | 0.17                   | Heart - Left Ventricle                   |
| ENSG00000108592.16 | FTSJ3       | 9.50E-07  | 0.22                   | Colon - Transverse                       |
| ENSG00000108592.16 | FTSJ3       | 0.0000032 | 0.18                   | Nerve - Tibial                           |
| ENSG00000108592.16 | FTSJ3       | 0.0000036 | 0.17                   | Esophagus - Muscularis                   |
| ENSG00000108592.16 | FTSJ3       | 0.0000049 | 0.21                   | Artery - Aorta                           |
| ENSG00000108592.16 | FTSJ3       | 0.0000098 | 0.26                   | Pancreas                                 |
| ENSG00000108592.16 | FTSJ3       | 0.000011  | 0.13                   | Lung                                     |

|                    |        |          |       |                                       |
|--------------------|--------|----------|-------|---------------------------------------|
| ENSG00000108592.16 | FTSJ3  | 0.000012 | 0.2   | Esophagus - Gastroesophageal Junction |
| ENSG00000108592.16 | FTSJ3  | 0.000015 | 0.13  | Skin - Sun Exposed (Lower leg)        |
| ENSG00000108592.16 | FTSJ3  | 0.000028 | 0.2   | Breast - Mammary Tissue               |
| ENSG00000108592.16 | FTSJ3  | 0.000042 | 0.16  | Adipose - Visceral (Omentum)          |
| ENSG00000108592.16 | FTSJ3  | 0.00008  | 0.22  | Prostate                              |
| ENSG00000108592.16 | FTSJ3  | 0.0001   | 0.15  | Adipose - Subcutaneous                |
| ENSG00000108592.16 | FTSJ3  | 0.00018  | 0.13  | Skin - Not Sun Exposed (Suprapubic)   |
| ENSG00000173826.14 | KCNH6  | 1.30E-30 | 0.53  | Lung                                  |
| ENSG00000087191.12 | PSMC5  | 0.000085 | 0.096 | Colon - Transverse                    |
| ENSG00000240280.6  | TCAM1P | 0.000028 | -0.22 | Nerve - Tibial                        |
| ENSG00000240280.6  | TCAM1P | 0.00023  | -0.17 | Adipose - Subcutaneous                |

1

2

1 **Supplementary Table 5. Single-tissue eQTLs for rs442495 downloaded from GTExPortal**

2 **Jan. 7<sup>th</sup> 2020**

| Gencode ID         | Gene Symbol  | P-Value   | Normalized Effect Size | Tissue                              |
|--------------------|--------------|-----------|------------------------|-------------------------------------|
| ENSG00000137845.14 | ADAM10       | 6.00E-14  | 0.21                   | Esophagus - Mucosa                  |
| ENSG00000137845.14 | ADAM10       | 5.80E-10  | 0.18                   | Skin - Sun Exposed (Lower leg)      |
| ENSG00000137845.14 | ADAM10       | 2.40E-07  | 0.1                    | Muscle - Skeletal                   |
| ENSG00000137845.14 | ADAM10       | 0.0000018 | 0.14                   | Skin - Not Sun Exposed (Suprapubic) |
| ENSG00000137845.14 | ADAM10       | 0.0000026 | -0.1                   | Nerve - Tibial                      |
| ENSG00000128923.10 | MINDY2       | 7.60E-13  | -0.21                  | Artery - Tibial                     |
| ENSG00000128923.10 | MINDY2       | 1.90E-07  | -0.098                 | Nerve - Tibial                      |
| ENSG00000128923.10 | MINDY2       | 2.10E-07  | -0.2                   | Artery - Aorta                      |
| ENSG00000128923.10 | MINDY2       | 4.00E-07  | 0.08                   | Whole Blood                         |
| ENSG00000259353.1  | RP11-30K9.5  | 0.000016  | -0.25                  | Cells - Cultured fibroblasts        |
| ENSG00000245975.2  | RP11-30K9.6  | 1.80E-08  | 0.25                   | Thyroid                             |
| ENSG00000245975.2  | RP11-30K9.6  | 0.0000054 | 0.32                   | Brain - Hypothalamus                |
| ENSG00000245975.2  | RP11-30K9.6  | 0.0000054 | 0.24                   | Pituitary                           |
| ENSG00000259250.1  | RP11-50C13.1 | 0.000043  | -0.18                  | Nerve - Tibial                      |

3  
4

1 **Supplementary Table 6. Single-tissue eQTLs for rs4575098 downloaded from GTExPortal**

2 **Jan. 7<sup>th</sup> 2020**

| Gencode ID         | Gene Symbol | P-Value  | Normalized Effect Size | Tissue                              |
|--------------------|-------------|----------|------------------------|-------------------------------------|
| ENSG00000158859.9  | ADAMTS4     | 2.30E-08 | -0.28                  | Cells - Cultured fibroblasts        |
| ENSG00000158850.14 | B4GALT3     | 1.10E-14 | -0.41                  | Cells - Cultured fibroblasts        |
| ENSG00000158850.14 | B4GALT3     | 6.00E-09 | -0.18                  | Adipose - Subcutaneous              |
| ENSG00000158850.14 | B4GALT3     | 5.20E-08 | -0.15                  | Skin - Sun Exposed (Lower leg)      |
| ENSG00000158850.14 | B4GALT3     | 1.40E-07 | -0.21                  | Breast - Mammary Tissue             |
| ENSG00000158850.14 | B4GALT3     | 1.40E-06 | -0.13                  | Nerve - Tibial                      |
| ENSG00000158850.14 | B4GALT3     | 4.00E-06 | -0.13                  | Skin - Not Sun Exposed (Suprapubic) |
| ENSG00000158869.10 | FCER1G      | 3.40E-10 | -0.13                  | Adipose - Subcutaneous              |
| ENSG00000158869.10 | FCER1G      | 1.20E-07 | -0.15                  | Muscle - Skeletal                   |
| ENSG00000158869.10 | FCER1G      | 1.80E-06 | -0.12                  | Esophagus - Muscularis              |
| ENSG00000158869.10 | FCER1G      | 1.90E-06 | -0.1                   | Adipose - Visceral (Omentum)        |
| ENSG00000158869.10 | FCER1G      | 2.80E-06 | -0.078                 | Whole Blood                         |
| ENSG00000158869.10 | FCER1G      | 5.70E-06 | -0.12                  | Nerve - Tibial                      |
| ENSG00000158869.10 | FCER1G      | 6.80E-06 | -0.14                  | Colon - Transverse                  |
| ENSG00000158869.10 | FCER1G      | 2.90E-05 | -0.1                   | Lung                                |
| ENSG00000225217.1  | HSPA7       | 1.60E-04 | -0.21                  | Skin - Sun Exposed (Lower leg)      |
| ENSG00000158864.12 | NDUFS2      | 4.80E-07 | -0.25                  | Brain - Cerebellum                  |
| ENSG00000158864.12 | NDUFS2      | 8.80E-07 | -0.13                  | Adipose - Subcutaneous              |
| ENSG00000158864.12 | NDUFS2      | 1.20E-06 | -0.16                  | Nerve - Tibial                      |
| ENSG00000158864.12 | NDUFS2      | 1.90E-06 | -0.16                  | Skin - Not Sun Exposed (Suprapubic) |
| ENSG00000158864.12 | NDUFS2      | 3.00E-06 | -0.092                 | Whole Blood                         |
| ENSG00000158864.12 | NDUFS2      | 3.30E-06 | -0.12                  | Skin - Sun Exposed (Lower leg)      |
| ENSG00000158864.12 | NDUFS2      | 5.70E-06 | -0.18                  | Breast - Mammary Tissue             |
| ENSG00000158864.12 | NDUFS2      | 1.30E-05 | -0.15                  | Artery - Tibial                     |
| ENSG00000158864.12 | NDUFS2      | 3.50E-05 | -0.18                  | Artery - Aorta                      |
| ENSG00000158864.12 | NDUFS2      | 4.90E-05 | -0.23                  | Brain - Caudate (basal ganglia)     |

1

2 **Supplementary Table 7. Single-tissue eQTLs for rs10496731 downloaded from**3 **GTEXPportal Feb. 28<sup>th</sup> 2019**

| Gencode ID         | Gene Symbol | P-Value  | Normalized Effect Size | Tissue                              |
|--------------------|-------------|----------|------------------------|-------------------------------------|
| ENSG00000224043.3  | AC016725.4  | 1.30E-05 | 0.21                   | Testis                              |
| ENSG00000224043.3  | AC016725.4  | 2.70E-05 | -0.42                  | Pituitary                           |
| ENSG00000082258.8  | CCNT2       | 1.20E-08 | 0.21                   | Testis                              |
| ENSG00000082258.8  | CCNT2       | 2.30E-08 | 0.15                   | Thyroid                             |
| ENSG00000082258.8  | CCNT2       | 1.60E-07 | 0.14                   | Nerve - Tibial                      |
| ENSG00000082258.8  | CCNT2       | 2.50E-07 | 0.14                   | Skin - Not Sun Exposed (Suprapubic) |
| ENSG00000082258.8  | CCNT2       | 4.50E-07 | 0.27                   | Pituitary                           |
| ENSG00000082258.8  | CCNT2       | 9.80E-06 | 0.14                   | Esophagus - Muscularis              |
| ENSG00000082258.8  | CCNT2       | 2.20E-05 | 0.1                    | Artery - Tibial                     |
| ENSG00000082258.8  | CCNT2       | 2.80E-05 | 0.16                   | Heart - Left Ventricle              |
| ENSG00000082258.8  | CCNT2       | 5.80E-05 | 0.11                   | Lung                                |
| ENSG00000152128.13 | TMEM163     | 4.30E-10 | 0.35                   | Testis                              |
| ENSG00000152128.13 | TMEM163     | 4.50E-10 | -0.41                  | Esophagus - Muscularis              |
| ENSG00000152128.13 | TMEM163     | 2.20E-06 | -0.26                  | Pituitary                           |
| ENSG00000152128.13 | TMEM163     | 5.90E-05 | -0.22                  | Esophagus - Mucosa                  |
| ENSG00000144224.12 | UBXN4       | 5.60E-06 | -0.12                  | Skin - Not Sun Exposed (Suprapubic) |

4

5



- 1 **Supplementary Table 8. Single-tissue eQTLs for rs11642612 downloaded from**
- 2 **GTExPortal Feb. 28<sup>th</sup> 2019**
- 3 Excel Document
- 4
- 5

1 **Supplementary Table 9. Single-tissue eQTLs for rs12595082 downloaded from**  
 2 **GTEPortal Feb. 28<sup>th</sup> 2019**

| Gencode ID        | Gene Symbol   | P-Value   | Normalized Effect Size | Tissue                                    |
|-------------------|---------------|-----------|------------------------|-------------------------------------------|
| ENSG00000138600.5 | SPPL2A        | 9.70E-14  | 0.38                   | Adipose - Subcutaneous                    |
| ENSG00000081014.6 | AP4E1         | 0.000057  | 0.18                   | Adipose - Subcutaneous                    |
| ENSG00000138600.5 | SPPL2A        | 3.00E-10  | 0.25                   | Adipose - Visceral (Omentum)              |
| ENSG00000138600.5 | SPPL2A        | 2.10E-07  | 0.31                   | Adrenal Gland                             |
| ENSG00000138600.5 | SPPL2A        | 4.60E-07  | 0.24                   | Artery - Aorta                            |
| ENSG00000138600.5 | SPPL2A        | 6.40E-09  | 0.35                   | Artery - Coronary                         |
| ENSG00000138600.5 | SPPL2A        | 2.90E-12  | 0.32                   | Artery - Tibial                           |
| ENSG00000138592.9 | USP8          | 2.20E-08  | 0.19                   | Artery - Tibial                           |
| ENSG00000138600.5 | SPPL2A        | 0.0000026 | 0.33                   | Brain - Frontal Cortex (BA9)              |
| ENSG00000140287.6 | HDC           | 0.0000082 | -0.51                  | Brain - Hippocampus                       |
| ENSG00000138600.5 | SPPL2A        | 0.000017  | 0.3                    | Brain - Nucleus accumbens (basal ganglia) |
| ENSG00000138600.5 | SPPL2A        | 2.40E-23  | 0.5                    | Cells - Transformed fibroblasts           |
| ENSG00000138600.5 | SPPL2A        | 3.50E-07  | 0.25                   | Colon - Sigmoid                           |
| ENSG00000138600.5 | SPPL2A        | 0.000014  | 0.16                   | Colon - Transverse                        |
| ENSG00000138600.5 | SPPL2A        | 0.000031  | 0.19                   | Esophagus - Mucosa                        |
| ENSG00000138600.5 | SPPL2A        | 3.20E-13  | 0.28                   | Esophagus - Muscularis                    |
| ENSG00000138592.9 | USP8          | 1.70E-09  | 0.17                   | Esophagus - Muscularis                    |
| ENSG00000138600.5 | SPPL2A        | 5.80E-11  | 0.27                   | Heart - Atrial Appendage                  |
| ENSG00000138600.5 | SPPL2A        | 7.40E-08  | 0.16                   | Heart - Left Ventricle                    |
| ENSG00000138600.5 | SPPL2A        | 3.90E-14  | 0.28                   | Lung                                      |
| ENSG00000138600.5 | SPPL2A        | 0.0000058 | 0.54                   | Minor Salivary Gland                      |
| ENSG00000138600.5 | SPPL2A        | 3.80E-14  | 0.25                   | Muscle - Skeletal                         |
| ENSG00000241130.1 | RP11-507J18.1 | 5.30E-12  | -0.38                  | Muscle - Skeletal                         |
| ENSG00000138600.5 | SPPL2A        | 1.70E-15  | 0.38                   | Nerve - Tibial                            |
| ENSG00000138600.5 | SPPL2A        | 0.000013  | 0.37                   | Pituitary                                 |
| ENSG00000138600.5 | SPPL2A        | 0.000091  | 0.16                   | Skin - Sun Exposed (Lower leg)            |
| ENSG00000138600.5 | SPPL2A        | 0.0000089 | 0.35                   | Testis                                    |
| ENSG00000138600.5 | SPPL2A        | 3.80E-11  | 0.25                   | Thyroid                                   |
| ENSG00000138592.9 | USP8          | 0.000046  | 0.16                   | Thyroid                                   |

3

1 **Supplementary Table 10. List of approximate conditional analyses**

| Trait                                          | Lead SNP   | Chr | Position GRCh37 | Conditional SNPs        |
|------------------------------------------------|------------|-----|-----------------|-------------------------|
| BMI                                            | rs359539   | 3   | 155282432       | rs4680176               |
| T2D                                            | rs10920254 | 1   | 201767474       | rs2820311               |
| CHD                                            | rs28394864 | 17  | 47450775        | rs4643373,<br>rs1294468 |
| T2D                                            | rs4351     | 17  | 61569732        | rs7210095               |
| TG                                             | rs4311     | 17  | 61560763        | rs894407                |
| UBXN4<br>eQTL in Not<br>Sun<br>Exposed<br>Skin | rs10496731 | 2   | 135597628       | rs23207727              |
| WHRadjBMI                                      | rs605928   | 15  | 59046163        | rs112075474             |
| AD                                             | rs605928   | 15  | 59046163        | rs112075474             |
| AD                                             | rs4308     | 17  | 61559625        | rs4311                  |
| AD                                             | rs4308     | 17  | 61559625        | rs4324                  |
| AD                                             | rs4324     | 17  | 61563171        | rs4308                  |
| ACE eQTL<br>in Lung                            | rs4308     | 17  | 61559625        | rs4324                  |
| ACE eQTL<br>in Lung                            | rs4324     | 17  | 61563171        | rs4308                  |
| ACE eQTL<br>in<br>Cerebellum                   | rs4308     | 17  | 61559625        | rs4342                  |
| ACE eQTL<br>in<br>Cerebellum                   | rs4342     | 17  | 61565998        | rs4308                  |
| ACE eQTL<br>in<br>Cerebellum                   | rs4308     | 17  | 61559625        | rs4342                  |
| ACE eQTL<br>in<br>Cerebellum                   | rs4342     | 17  | 61565998        | rs4308                  |
| T2D                                            | rs4324     | 17  | 61563171        | rs4308,<br>rs7210095    |
| T2D                                            | rs4308     | 17  | 61559625        | rs4342,<br>rs7210095    |

2

1 **Supplementary Table 11. AD-centric bivariate analysis single-tissue-eQTL results**

| Cardiometabolic Trait | Locus Name     | Lead SNP  | Effect Allele/ Other Allele | Direction of Effect<br>AD/CM | Bivariate P-value | eGene(s) | Tissue                 | Conditional Posterior Probability of Colocalization | Direction of Expression of eQTL |
|-----------------------|----------------|-----------|-----------------------------|------------------------------|-------------------|----------|------------------------|-----------------------------------------------------|---------------------------------|
| DBP                   | <i>ADAM10</i>  | rs442495  | T/C                         | +/+                          | 1.98e-10          | MINDY2   | Tibial Nerve           | 0.90                                                | +                               |
| WHRadj BMI            | <i>ADAMTS4</i> | rs4575098 | A/G                         | +/+                          | 4.45e-13          | NDUFS2   | Whole Blood            | 1.00                                                | -                               |
| WHRadj BMI            | <i>ADAMTS4</i> | rs4575098 | A/G                         | +/+                          | 4.45e-13          | NDUFS2   | Aorta Artery           | 0.98                                                | -                               |
| WHRadj BMI            | <i>ADAMTS4</i> | rs4575098 | A/G                         | +/+                          | 4.45e-13          | NDUFS2   | Tibial Artery          | 0.93                                                | -                               |
| WHRadj BMI            | <i>ADAMTS4</i> | rs4575098 | A/G                         | +/+                          | 4.45e-13          | NDUFS2   | Skin - Not Sun Exposed | 0.88                                                | -                               |
| WHRadj BMI            | <i>ADAMTS4</i> | rs4575098 | A/G                         | +/+                          | 4.45e-13          | NDUFS2   | Brain - Basal Ganglia  | 0.83                                                | -                               |
| WHRadj BMI            | <i>ADAMTS4</i> | rs4575098 | A/G                         | +/+                          | 4.45e-13          | FCER1G   | Tibial Nerve           | 0.81                                                | -                               |
| WHRadj BMI            | <i>ADAMTS4</i> | rs4575098 | A/G                         | +/+                          | 4.45e-13          | NDUFS2   | Subcutaneous Adipose   | 0.81                                                | -                               |
| DBP                   | <i>ACE</i>     | rs4308    | G/A                         | +/-                          | 7.05e-15          | ACE      | Skin - Not Sun Exposed | 0.99                                                | -                               |
| DBP                   | <i>ACE</i>     | rs4308    | G/A                         | +/-                          | 7.05e-15          | ACE      | Kidney Cortex          | 0.99                                                | +                               |
| DBP                   | <i>ACE</i>     | rs4308    | G/A                         | +/-                          | 7.05e-15          | ACE      | Transverse Colon       | 0.98                                                | +                               |
| DBP                   | <i>ACE</i>     | rs4308    | G/A                         | +/-                          | 7.05e-15          | DCAF7    | Lung                   | 0.98                                                | +                               |

|     |            |        |     |     |          |            |                        |      |   |
|-----|------------|--------|-----|-----|----------|------------|------------------------|------|---|
| DBP | <i>ACE</i> | rs4308 | G/A | +/- | 7.05e-15 | <i>ACE</i> | Subcutaneous Adipose   | 0.97 | - |
| DBP | <i>ACE</i> | rs4308 | G/A | +/- | 7.05e-15 | <i>ACE</i> | Visceral Adipose       | 0.97 | - |
| DBP | <i>ACE</i> | rs4308 | G/A | +/- | 7.05e-15 | <i>ACE</i> | Skin - Sun Exposed     | 0.97 | - |
| DBP | <i>ACE</i> | rs4308 | G/A | +/- | 7.05e-15 | <i>ACE</i> | Brain – Frontal Cortex | 0.94 | - |
| DBP | <i>ACE</i> | rs4308 | G/A | +/- | 7.05e-15 | <i>ACE</i> | Adrenal Gland          | 0.93 | - |
| DBP | <i>ACE</i> | rs4308 | G/A | +/- | 7.05e-15 | <i>ACE</i> | Tibial Nerve           | 0.90 | - |
| DBP | <i>ACE</i> | rs4308 | G/A | +/- | 7.05e-15 | <i>ACE</i> | Aorta Artery           | 0.89 | - |
| DBP | <i>ACE</i> | rs4308 | G/A | +/- | 7.05e-15 | <i>ACE</i> | Lung                   | 0.89 | + |

1  
2 Direction of effect first position is the direction of effect of the effect allele on AD and the second position is the direction of effect of  
3 the effect allele on the cardiometabolic trait; Conditional Posterior Probability of Colocalization, PP4/ (PP3 + PP4) from the results of  
4 the single-tissue-eQTL colocalization analysis

1 **Table S12. Locus discovery analysis single-tissue-eQTL results**  
2 Excel Document

3

1 **Supplemental Table 13. Human Splice Finder 3 results for rs144867634**

| Sequence Position | cDNA Position | Splice site type | Motif          | New splice site | Wild Type | Mutant | Variation | (%)   |
|-------------------|---------------|------------------|----------------|-----------------|-----------|--------|-----------|-------|
| 227               | 127           | Acceptor         | TATACATgtaagaa | tatacgtgtaagAA  | 72.07     | 72.02  | NA        | -0.07 |
| 231               | 131           | Donor            | CATgtaaga      | CGTgtaaga       | 86.8      | 81.94  | 142       | -5.6  |

2

3

1 **Supplemental Table 14. AVISPA results on rs144867634 A allele**

| AVISPA Analysis                                       | False Positive Rate | Rank  | Sensitivity |
|-------------------------------------------------------|---------------------|-------|-------------|
| Exon is alternative vs constitutively spliced         | 0.016               | 0.048 | 0.399       |
| Splicing is altered in central nervous system tissues | 0.091               | 0.077 | 0.569       |
| Splicing is altered in muscle tissue                  | 0.085               | 0.067 | 0.573       |
| Splicing is altered in embryo tissue                  | 0.114               | 0.125 | 0.682       |
| Splicing is altered in digestive tissues              | 0.043               | 0.070 | 0.567       |

2  
3 FPR, false positive rate based on the data used to train the AVISPA model; Rank, the fraction of  
4 samples in the reference data that have a score at least as high as the query; Sensitivity, based  
5 on the data used to train the AVISPA model.

6  
7



1 **Supplemental Table 15. AVISPA results on rs144867634 G allele**

| AVISPA Analysis                                       | False Positive Rate | Rank  | Sensitivity |
|-------------------------------------------------------|---------------------|-------|-------------|
| Exon is alternative vs constitutively spliced         | 0.002               | 0.008 | 0.136       |
| Splicing is altered in central nervous system tissues | 0.012               | 0.008 | 0.219       |
| Splicing is altered in muscle tissue                  | 0.044               | 0.020 | 0.285       |
| Splicing is altered in embryo tissue                  | 0.070               | 0.062 | 0.527       |
| Splicing is altered in digestive tissues              | 0.022               | 0.013 | 0.190       |

2  
3 FPR, false positive rate based on the data used to train the AVISPA model; Rank, the fraction of  
4 samples in the reference data that have a score at least as high as the query; Sensitivity, based  
5 on the data used to train the AVISPA model.

6

## 1 Supplemental References:

- 2 1. Purcell S, Neale B, Todd-Brown K, Thomas L, Ferreira MAR, Bender D, et al. PLINK: A  
3 tool set for whole-genome association and population-based linkage analyses. *Am J Hum*  
4 *Genet.* 2007;81(3):559–75.
- 5 2. Zhao W, Rasheed A, Tikkanen E, Lee JJ, Butterworth AS, Howson JMM, et al.  
6 Identification of new susceptibility loci for type 2 diabetes and shared etiological pathways  
7 with coronary heart disease. *Nat Genet.* 2017 Oct 1;49(10):1450–7.
- 8 3. Ray D, Boehnke M. Methods for meta-analysis of multiple traits using GWAS summary  
9 statistics. *Genet Epidemiol* [Internet]. 2018 [cited 2019 Aug 21];42(2):134–45. Available  
10 from: <http://www.ncbi.nlm.nih.gov/pubmed/29226385>
- 11 4. Siewert KM, Voight BF. Bivariate Genome-Wide Association Scan Identifies 6 Novel Loci  
12 Associated With Lipid Levels and Coronary Artery Disease. *Circ Genomic Precis Med*  
13 [Internet]. 2018 Dec [cited 2019 Mar 8];11(12). Available from:  
14 <https://www.ahajournals.org/doi/10.1161/CIRCGEN.118.002239>
- 15 5. Hemani G, Zheng J, Elsworth B, Wade KH, Haberland V, Baird D, et al. The MR-Base  
16 platform supports systematic causal inference across the human phenome. *Elife*  
17 [Internet]. 2018 May 30 [cited 2018 Aug 29];7. Available from:  
18 <https://elifesciences.org/articles/34408>
- 19 6. Altshuler DM, Durbin RM, Abecasis GR, Bentley DR, Chakravarti A, Clark AG, et al. An  
20 integrated map of genetic variation from 1,092 human genomes. *Nature.* 2012 Nov  
21 1;491(7422):56–65.
- 22 7. Giambartolomei C, Zhenli Liu J, Zhang W, Hauberg M, Shi H, Boocock J, et al. A  
23 Bayesian framework for multiple trait colocalization from summary association statistics.  
24 Berger B, editor. *Bioinformatics* [Internet]. 2018 Aug 1 [cited 2019 Apr 1];34(15):2538–45.  
25 Available from: <http://www.ncbi.nlm.nih.gov/pubmed/29579179>
- 26 8. Xin J, Mark A, Afrasiabi C, Tsueng G, Juchler M, Gopal N, et al. High-performance web

1 services for querying gene and variant annotation. *Genome Biol* [Internet]. 2016 May 6  
2 [cited 2020 Mar 19];17(1):91. Available from:  
3 <http://genomebiology.biomedcentral.com/articles/10.1186/s13059-016-0953-9>

4 9. Rentzsch P, Witten D, Cooper GM, Shendure J, Kircher M. CADD: Predicting the  
5 deleteriousness of variants throughout the human genome. *Nucleic Acids Res*. 2019 Jan  
6 8;47(D1):D886–94.

7 10. Desmet FO, Hamroun D, Lalande M, Collod-B  roud G, Claustres M, B  roud C. Human  
8 Splicing Finder: An online bioinformatics tool to predict splicing signals. *Nucleic Acids*  
9 *Res*. 2009;37(9).

10 11. Barash Y, Vaquero-Garcia J, Gonz  lez-Vallinas J, Xiong HY, Gao W, Lee LJ, et al.  
11 AVISPA: A web tool for the prediction and analysis of alternative splicing. *Genome Biol*  
12 [Internet]. 2013 Oct 24 [cited 2020 Mar 19];14(10):R114. Available from:  
13 <http://www.ncbi.nlm.nih.gov/pubmed/24156756>  
14  
15
